# Supplementary material
Source: ML conference proceedings conference paper supplement (https://openaccess.thecvf.com/content/CVPR2023/html/Qian_Adaptive_Data-Free_Quantization_CVPR_2023_paper.html)
Supplement: Supplementary file 1 [file Qian_Adaptive_Data-Free_Quantization_CVPR_2023_supplemental.pdf]

# Adaptive Data-Free Quantization

## Supplementary Material

Biao Qian, Yang Wang\*, Richang Hong, Meng Wang  
Key Laboratory of Knowledge Engineering with Big Data, Ministry of Education,  
School of Computer Science and Information Engineering,  
Hefei University of Technology, China

yangwang@hfut.edu.cn, {hfutqian, hongrc.hfut, eric.mengwang}@gmail.com

Due to page limitation of the main body, as indicated, the supplementary material offers further discussion on the hyper-parameters and more visual results with higher resolution, which are summarized below:

- Additional parameter studies about the hyper-parameters  $\alpha_{ds}$  and  $\alpha_{as}$  in Eq.(9) as well as  $\beta$  and  $\gamma$  in Eq.(12), as mentioned in Sec.3.1 of the main body (Sec.A).
- Additional ablation study about the number of generated samples from the generator (G) during the training phase (Sec.B).
- Visualization of real and generated samples with *higher resolution*, as mentioned in Sec.3.5 of the main body (Sec.C).

## A. Additional Parameter Studies

### A.1. $\alpha_{ds}$ and $\alpha_{as}$ in Eq.(9)

In this section, we further study the parameters  $\alpha_{ds}$  and  $\alpha_{as}$  in Eq.(9) of the main body on the balance process. We perform that via varied  $\alpha_{ds} \in \{0, 0.1, 0.2, 0.3, 0.4, 0.6, 0.8\}$  with  $\alpha_{as} = 0.1$  (Fig.1(a)) and  $\alpha_{as} \in \{0, 0.1, 0.2, 0.3, 0.4, 0.6, 0.8\}$  with  $\alpha_{ds} = 0.2$  (Fig.1(b)), where the ablation studies are carried out under 3-bit precision upon ResNet-18, to serve as full-precision (P) and quantized network (Q) on ImageNet. It is observed that the optimal performance is achieved with  $\alpha_{ds}^* = 0.2$  and  $\alpha_{as}^* = 0.1$  (as adopted in the main experiments), confirming the effectiveness of balancing disagreement with agreement sample. Accordingly, the results offer an *evidence* that the balance process is conducive to generating the sample with adaptive adaptability (*i.e.*, neither too large nor small  $\mathcal{H}'_{info}(p_{ds})$ ) to Q under varied bit widths, which address the over-and-under fitting issues.

### A.2. $\beta$ in Eq.(12)

The parameter  $\beta$  in Eq.(12) of the main body is utilized to balance the disagreement and agreement samples. To validate the effectiveness of the balance process, we further perform the experiments over varied  $\beta$  (*i.e.*, 0, 0.2, 0.4, 0.6, 0.8, 1.0, 2.0, 5.0) under 5-bit precision upon ResNet-18, to serve as P and Q on ImageNet. Fig.2(a) illustrates that AdaDFQ obtains the best result given  $\beta^* = 0.8$ , implying that carefully adjusting  $\beta$  can earn the extra accuracy gains. By contrast, the accuracy for AdaDFQ drops sharply when  $\beta$  exceeds 1, in that G focuses more on the disagreement and agreement samples with a larger  $\beta$ , which leads to the generated samples with either too large or small  $\mathcal{H}'_{info}(p_{ds})$  beyond the capacity of the balance process.

### A.3. $\gamma$ in Eq.(12)

$\gamma$  is the balance parameter for  $\mathcal{L}_{BNS}$  in Eq.(12) of the main body, which aims to balance the distribution information about the training data from P on the generated samples from G. We testify  $\gamma \in \{0, 0.2, 0.4, 0.6, 0.8, 1.0, 2.0, 5.0, 10\}$  to perform

---

\*Yang Wang is the corresponding author.

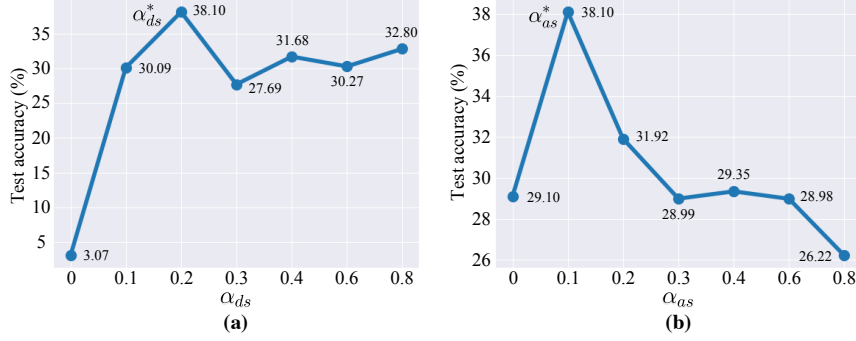

Figure 1. Parameter studies about the effectiveness of  $\alpha_{ds}$  and  $\alpha_{as}$  in Eq.(10) on ImageNet.

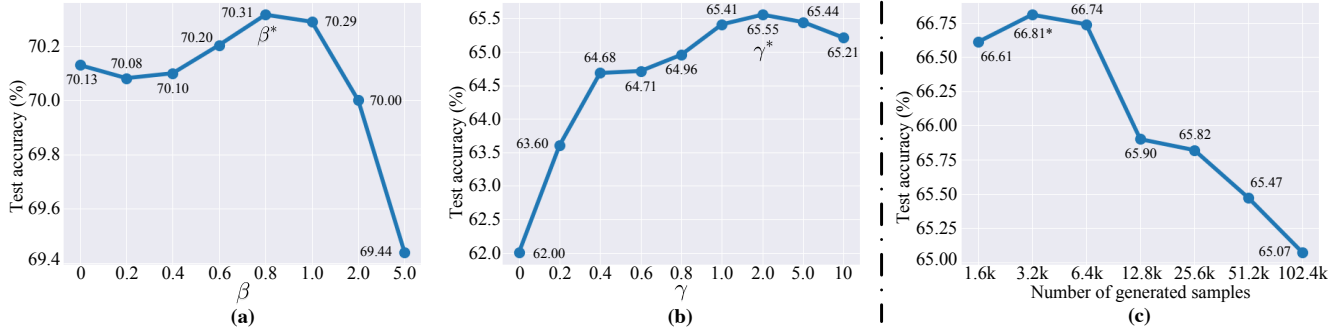

Figure 2. (a)(b) Ablation studies about the parameters  $\beta$  and  $\gamma$  in Eq.(13) on ImageNet. (c) Illustration of how the number of generated samples from G affects AdaDFQ on CIFAR-100.

the experiments under 4-bit precision with MobileNetV2, to serve as P and Q on ImageNet. Fig.2(b) illustrates that the *peak* appears at  $\gamma^* = 2.0$ , while the accuracy remains stable (ranging from 65.41% to 65.55%) around  $\gamma = 2.0$  (ranging from 1.0 to 5.0), implying that AdaDFQ can maximally recover the performance of Q via the generated samples from G within a *batch* by exploiting the distribution information about the training data from P.

## B. Additional Ablation Study about the Number of Generated Samples

We further investigate the effect of the number of generated samples over the calibration process of Q for AdaDFQ. In particular, we generate different numbers of generated samples, *i.e.*, 1.6k, 3.2k (as adopted in the main experiments), 6.4k, 12.8k, 25.6k, 51.2k and 102.4k, under 4-bit precision upon ResNet-20, to serve as P and Q on CIFAR-100. Fig.2(c) illustrates that AdaDFQ obtains the superior performance (ranging from 66.61% to 66.81%) around 3.2k (ranging from 1.6k to 6.4k), while suffers from a large performance degradation when the number of generated samples continues to increase. The *intuition* is that, it can't be guaranteed that all generated sample (especially for large number of generated samples) are informative to Q, owing to the limited capacity of G, which, in turn, highlights the *importance* of generating the sample with adaptive adaptability to Q.

## C. Visual Analysis on Generated Samples with Higher Resolution

As mentioned in Sec.3.5, we further offer the visual results of real and generated samples with *higher resolution* due to page limitation; see Fig.3. The results show that, the generated samples from varied categories (*i.e.*, varied rows) that correspond to the real samples, differ greatly from each other, confirming the effectiveness of the category information extracted from P; while the generated samples under different bit-width scenarios (*i.e.*, 3 bit, 4 bit and 5bit) vary greatly, confirming that AdaDFQ succeeds in generating the sample with adaptive adaptability to Q with varied bit widths, which are consistent with our analysis in the main body.

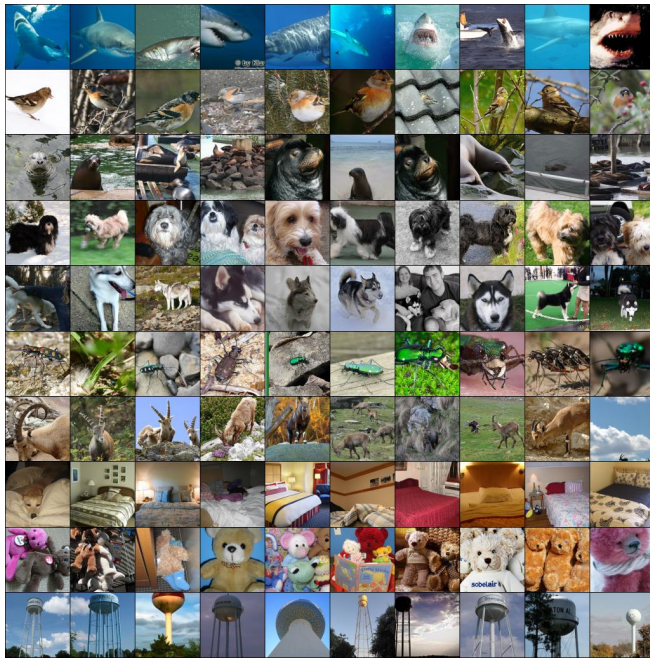

**Real samples**

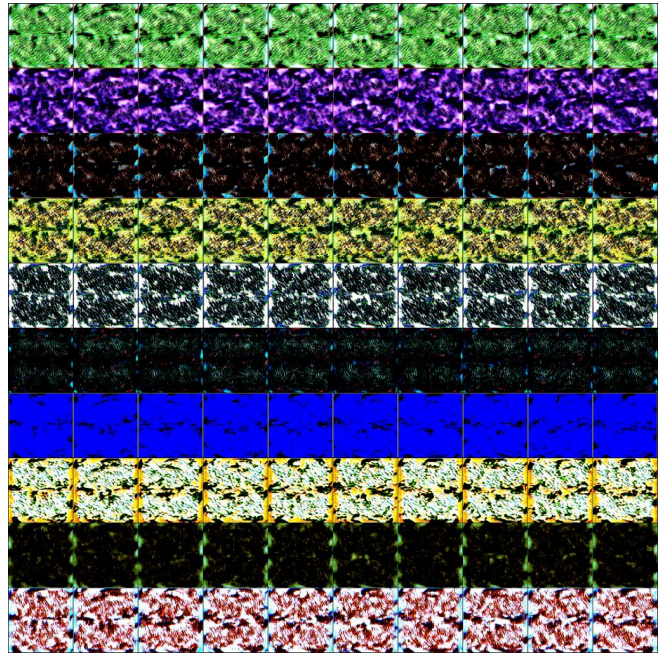

**Generated samples  
(3-bit precision)**

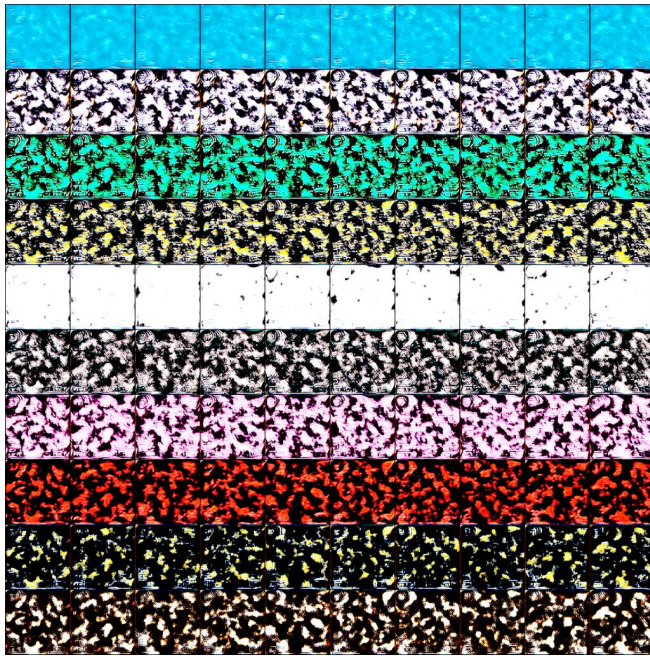

**Generated samples  
(4-bit precision)**

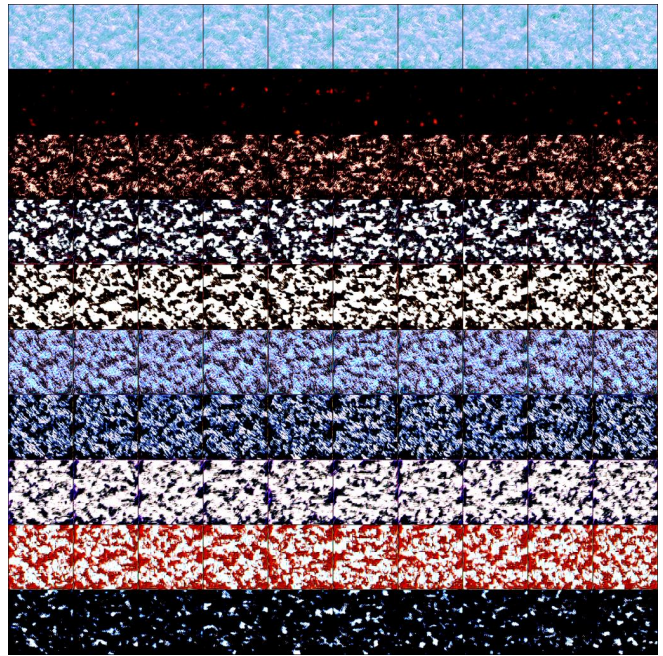

**Generated samples  
(5-bit precision)**

Figure 3. Visualization of real and generated samples, as an *extension* of Fig.6 in the main body, where each row denotes one of 10 randomly chosen classes from ImageNet.
